# Supplementary material for: A systematic evaluation of the biocompatibility of cucurbit[7]uril in mice
Source: PubMed Central journal article supplement (PMC5995857; doi:10.1038/s41598-018-27206-6), 2018-06-11
Supplement: 41598_2018_27206_MOESM1_ESM.pdf [file 41598_2018_27206_MOESM1_ESM.pdf]

# Supporting Information

## A systematic evaluation of the biocompatibility of cucurbit[7]uril in mice

**Xiangjun Zhang<sup>1</sup>, Xiaoqiu Xu<sup>2,3</sup>, Shengke Li<sup>1</sup>, Lian-Hui Wang,<sup>4</sup> Jianxiang Zhang<sup>2,3,\*</sup>, and Ruibing Wang<sup>1,\*</sup>**

<sup>1</sup>State Key Laboratory of Quality Research in Chinese Medicine, and Institute of Chinese Medical Sciences, University of Macau, Taipa, Macau, China

<sup>2</sup>Department of Pharmaceutics, College of Pharmacy, Third Military Medical University, Chongqing 400038, China

<sup>3</sup>Institute of Materia Medica, College of Pharmacy, Third Military Medical University, Chongqing 400038, China

<sup>4</sup>Key Laboratory for Organic Electronics and Information Displays, Institute of Advanced Materials, Nanjing University of Posts & Telecommunications, Nanjing 210046, China.

\*Corresponding authors: [rwang@umac.mo](mailto:rwang@umac.mo) or [jxzhang@tmmu.edu.cn](mailto:jxzhang@tmmu.edu.cn)

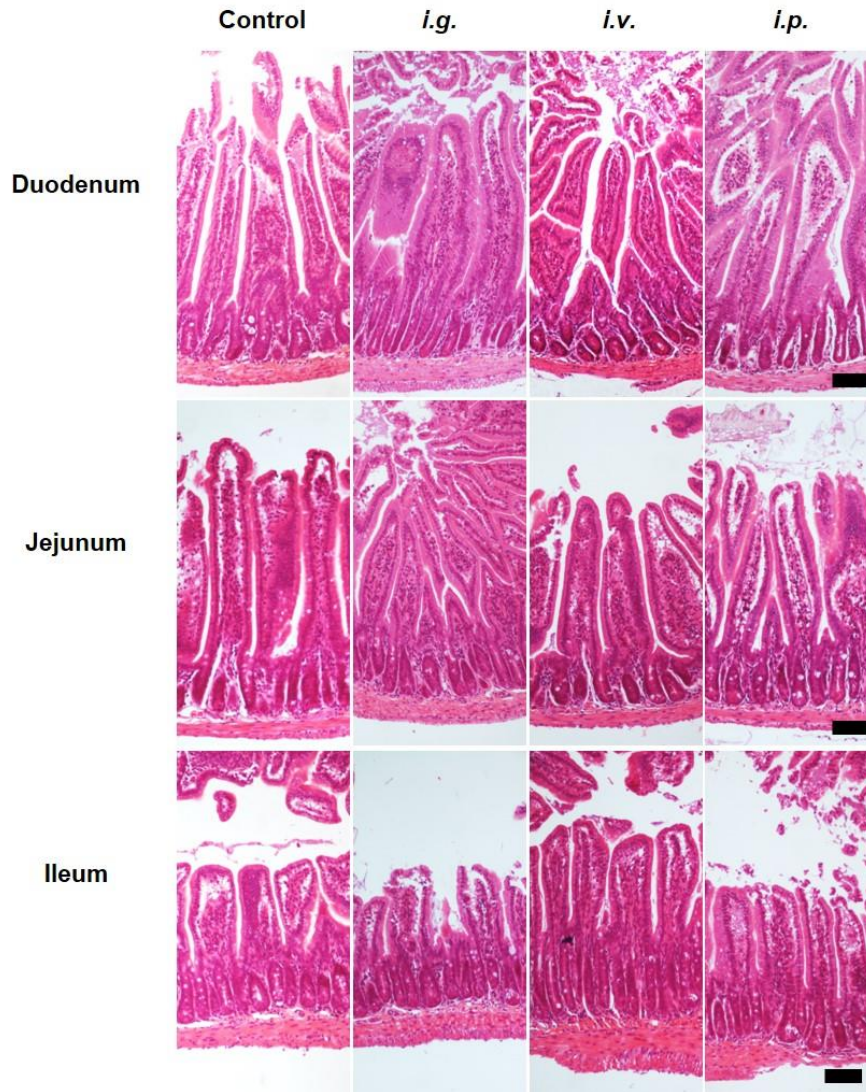

**Fig. S1** H&E stained sections of intestine tissues collected from mice 21 days after *i.g.*, *i.v.* and *i.p.* administration with CB[7]. Scale bar = 200  $\mu$ m.

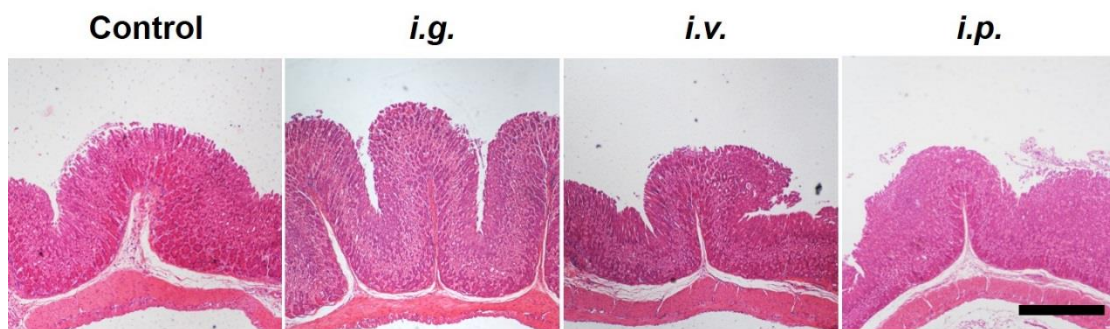

**Fig. S2** H&E stained sections of stomach from mice 21 days after *i.g.*, *i.v.* and *i.p.* administration with CB[7]. Scale bar = 500  $\mu$ m.
